# Supplementary material for: Unraveling Subcellular and Ultrastructural Changes During Vitrification of Human Spermatozoa: Effect of a Mitochondria-Targeted Antioxidant and a Permeable Cryoprotectant
Source: Frontiers journal article supplement (doi:10.3389/fcell.2021.672862), 2021-07-02

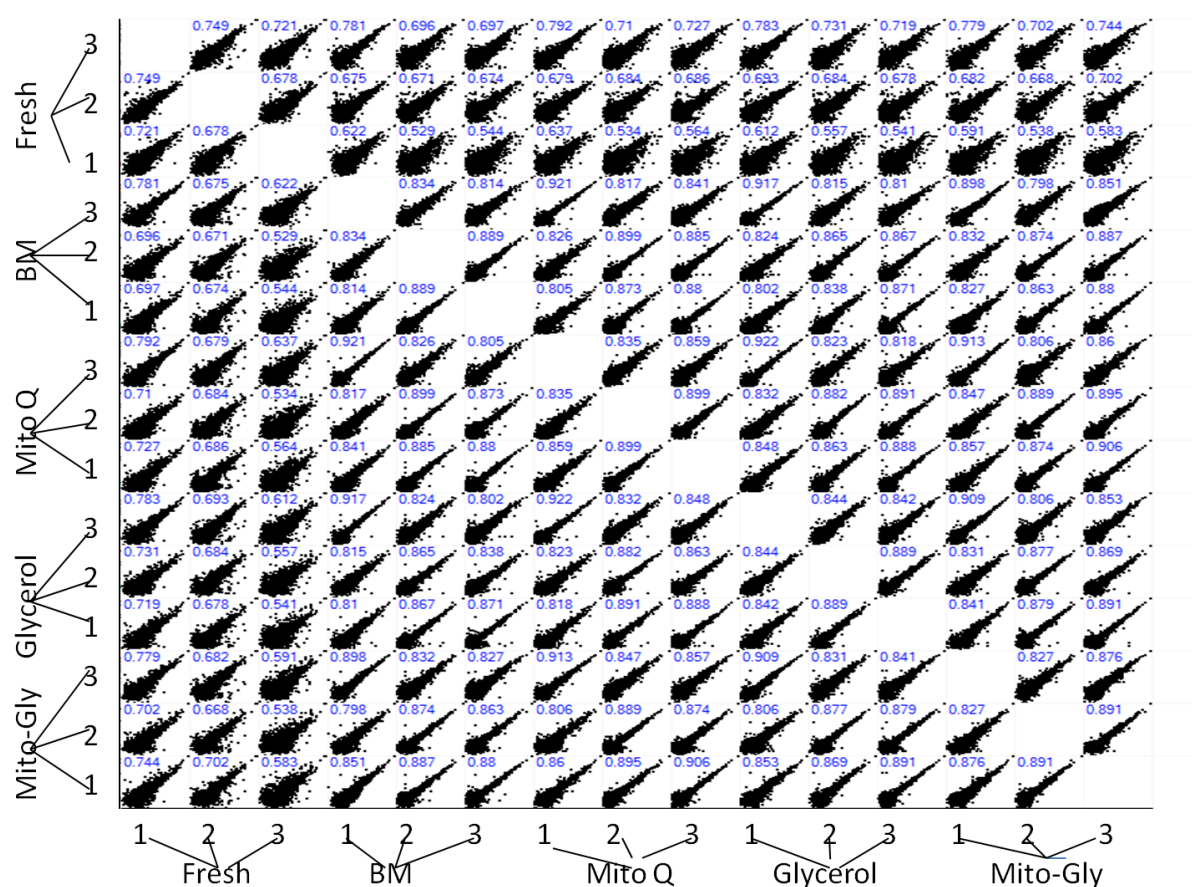

Supplement: Image_1.PDF [file Image_1.PDF]
